# Supplementary material for: Iron phosphide nanocrystals decorated in situ on heteroatom-doped mesoporous carbon nanosheets used for an efficient oxygen reduction reaction in both alkaline and acidic media
Source: Royal Society of Chemistry journal article supplement (doi:10.1039/c7ra02349a), 2017-01-01
Supplement: c7ra02349a1.pdf [file c7ra02349a1.pdf]

## Supporting Information

### **Iron phosphide nanocrystals in situ decorated on heteroatom-doped mesoporous carbon nanosheets for efficient oxygen reduction reaction in both alkaline and acidic media**

Xueyan Xu, Chengxiang Shi, Rui Chen and Tiehong Chen\*

School of Materials Science and Engineering, Institute of New Catalytic Materials  
Science Institute of New Catalytic Materials Science, Key Laboratory of Advanced  
Energy Materials Chemistry (MOE), Collaborative Innovation Center of Chemical  
Science and Engineering (Tianjin), Nankai University, Tianjin 300071

\* E-mail: [chenth@nankai.edu.cn](mailto:chenth@nankai.edu.cn)

**Table S1.** BET surface areas and total pore volumes of FeP@PNC obtained at different carbonization temperatures

| Samples      | T(°C) <sup>a</sup> | S <sub>BET</sub> (m <sup>2</sup> g <sup>-1</sup> ) <sup>b</sup> | V <sub>total</sub> (cm <sup>3</sup> g <sup>-1</sup> ) <sup>c</sup> |
|--------------|--------------------|-----------------------------------------------------------------|--------------------------------------------------------------------|
| FeP@PNC-800  | 800                | 152                                                             | 0.70                                                               |
| FeP@PNC-900  | 900                | 724                                                             | 1.62                                                               |
| FeP@PNC-1000 | 1000               | 571                                                             | 1.09                                                               |

<sup>a</sup> Carbonization temperature.

<sup>b</sup> BET specific surface areas obtained from N<sub>2</sub> adsorption isotherm in the range of P/P<sub>0</sub> = 0.05-0.3.

<sup>c</sup> Total pore volume was obtained at P/P<sub>0</sub> of 0.98.

**Table S2.** XPS data for the surface species of FeP@PNC-T materials obtained at the different temperatures

| Samples        | C (at. %) | N (at. %) | P (at. %) | Fe (at. %) | O (at. %) |
|----------------|-----------|-----------|-----------|------------|-----------|
| FeP@PNC-800    | 32.41     | 29.04     | 16.41     | 4.58       | 17.56     |
| FeP@PNC-900    | 81.37     | 4.21      | 3.59      | 1.24       | 9.59      |
| FeP@PNC-1000   | 89.22     | 3.10      | 1.43      | 0.49       | 5.76      |
| FeP@PNC-900-BL | 81.53     | 4.10      | 1.59      | 0.78       | 12.0      |

**Table S3.** XPS data for the surface species of FeP@PNC-T materials obtained at the different temperatures and their content of carbon and nitrogen species

| Sample         | C1 (%) | C2 (%) | C3 (%) | C4 (%) | pyridinic-N (%) | graphitic-N (%) | oxidized-N (%) |
|----------------|--------|--------|--------|--------|-----------------|-----------------|----------------|
| FeP@PNC-800    | 47.09  | 42.02  | 10.89  | -      | 52.62           | 40.73           | 6.65           |
| FeP@PNC-900    | 58.28  | 33.59  | 5.56   | 2.57   | 46.0            | 46.52           | 7.48           |
| FeP@PNC-1000   | 67.14  | 22.44  | 7.70   | 2.72   | 41.36           | 49.12           | 9.52           |
| FeP@PNC-900-BL | 61.71  | 20.03  | 5.50   | 4.76   | 41.33           | 49.60           | 9.07           |

**Table S4.** The data of catalytic activity for FeP@PNC-T in 0.1 M KOH solution

| Samples        | Onset-potential<br>V (vs. Ag/AgCl) | Half-wave<br>potential | $J^a$<br>(mA cm <sup>-2</sup> ) |
|----------------|------------------------------------|------------------------|---------------------------------|
| FeP@PNC-800    | -0.110                             | -0.473                 | 0.017                           |
| FeP@PNC-900    | -0.054                             | -0.138                 | 2.813                           |
| FeP@PNC-1000   | 0.062                              | -0.191                 | 1.926                           |
| FeP@PNC-900-BL | 0.013                              | -0.188                 | 1.819                           |
| Pt/C           | 0.067                              | -0.155                 | 2.375                           |

<sup>a</sup> The diffusion ( $J$ ) limiting current density at -0.15 V determined at the polarization curve at 1600rpm in 0.1 M KOH solution

**Table S5.** The data of catalytic activity for FeP@PNC-T in 0.5 M H<sub>2</sub>SO<sub>4</sub> solution

| Samples        | Onset-potential<br>V (vs. Ag/AgCl) | Half-wave<br>potential | $J^a$<br>(mA cm <sup>-2</sup> ) |
|----------------|------------------------------------|------------------------|---------------------------------|
| FeP@PNC-800    | 0.366                              | -0.067                 | 0.510                           |
| FeP@PNC-900    | 0.576                              | 0.487                  | 4.310                           |
| FeP@PNC-1000   | 0.557                              | 0.456                  | 3.662                           |
| FeP@PNC-900-BL | 0.520                              | 0.361                  | 2.623                           |
| Pt/C           | 0.634                              | 0.547                  | 4.247                           |

<sup>a</sup> The diffusion ( $J$ ) limiting current density at 0.35 V determined at the polarization curve at

1600rpm in 0.5 M H<sub>2</sub>SO<sub>4</sub> solution

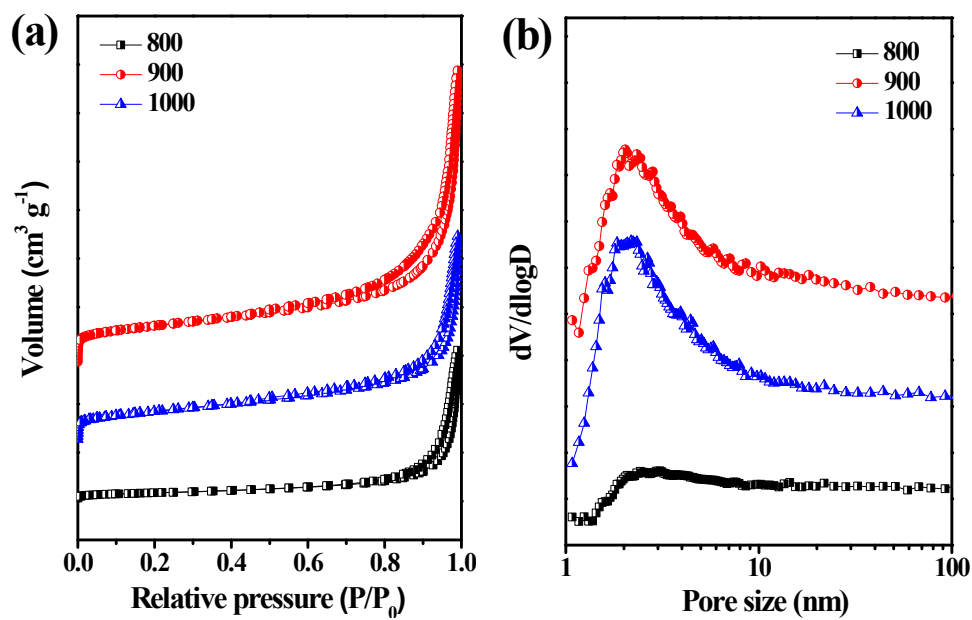

**Fig. S1** (a) Nitrogen adsorption-desorption isotherms of FeP@PNC samples prepared at different carbonization temperature of 800, 900 and 1000°C, respectively; (b) the corresponding pore size distribution curves.

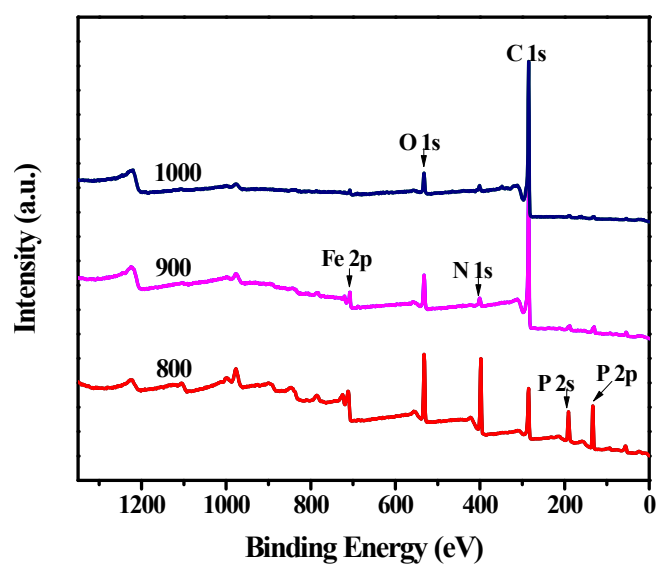



**Fig. S2** Wide XPS survey of the FeP@PNC samples prepared at different carbonization temperature of 800, 900 and 1000°C, respectively.

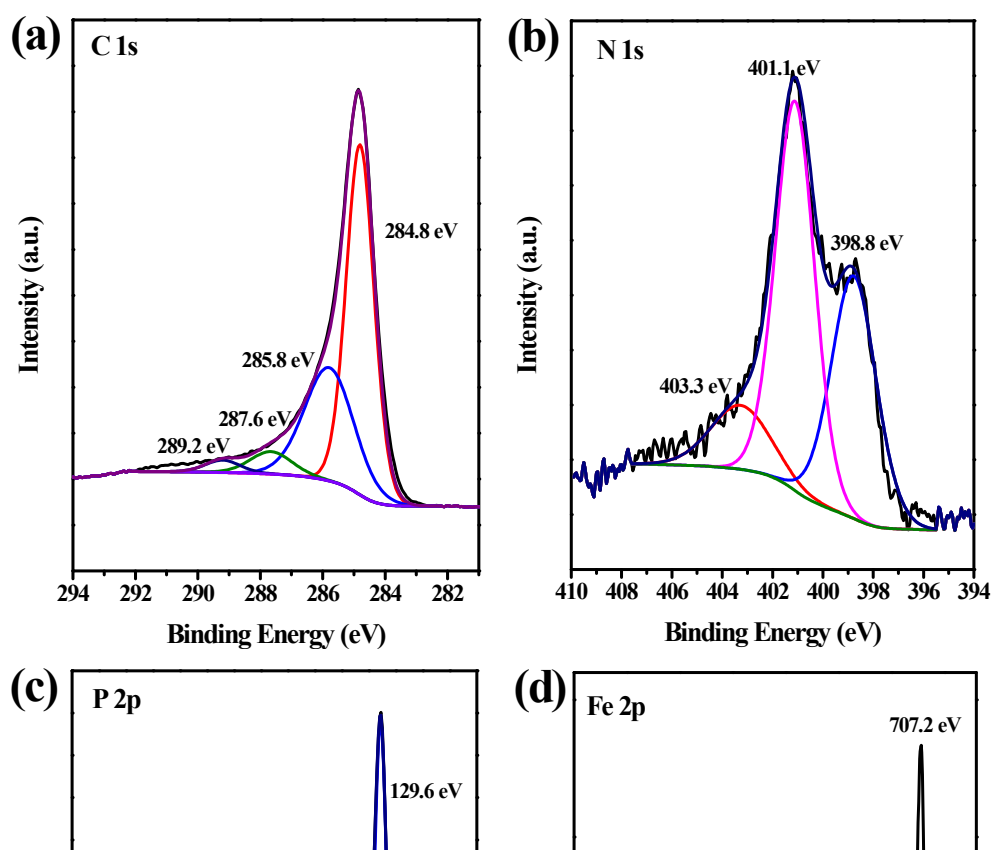

**Fig. S3** High-resolution (a) C1s, (b) N1s, (c) P 2p and (d) Fe 2p spectra of the FeP@PNC-900.

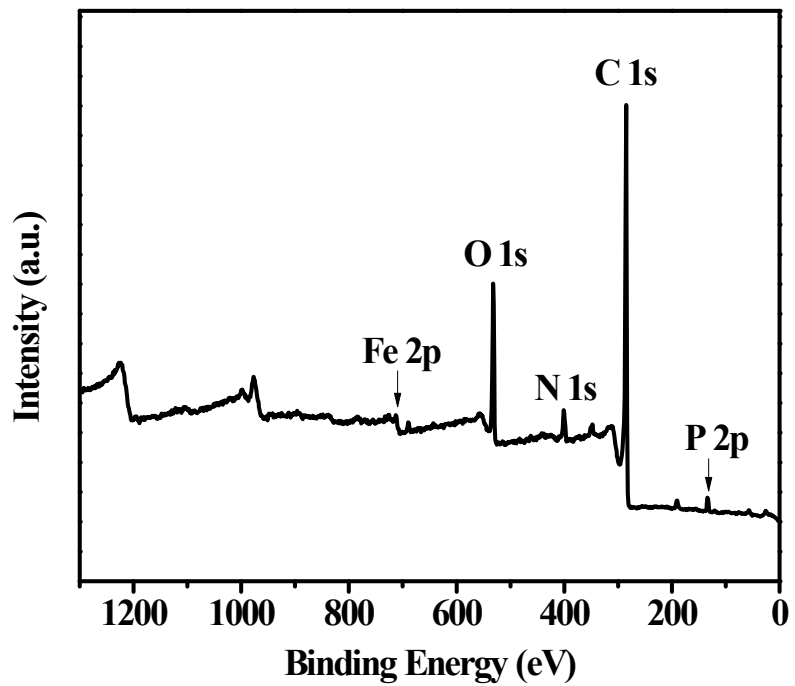

**Fig. S4** Wide XPS survey of the FeP@PNC-900-BL samples.

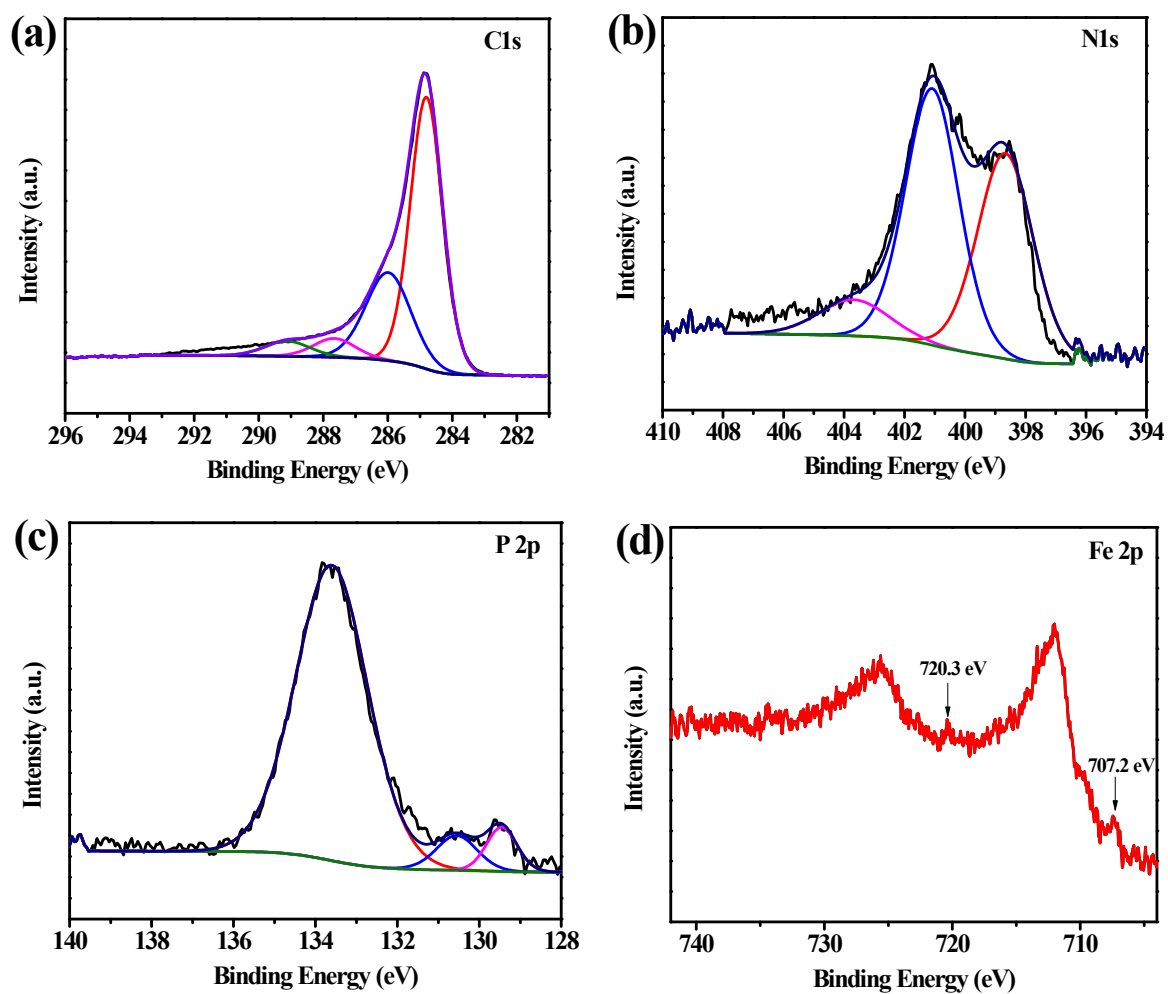

**Fig. S5** High-resolution (a) C1s, (b) N1s, (c) P 2p and (d) Fe 2p spectra of the FeP@PNC-900-BL.

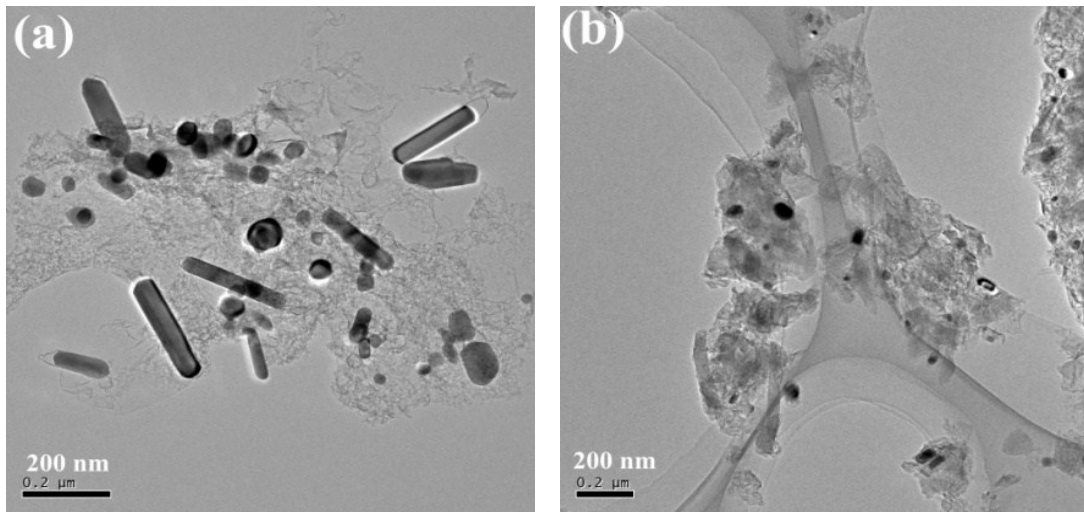

**Fig. S6** TEM images of (a)FeP@PNC-900 and (b) FeP@PNC-900-BL
